# Supplementary material for: An Earlier Spring Phenology Reduces Vegetation Growth Rate during the Green-Up Period in Temperate Forests
Source: MDPI journal article supplement (doi:10.3390/f14101984), 2023-10-01
Supplement: s1 [file s1]

Archive with 1 entries (1 files):
- forests-2613957-supplementary.pdf
