# Supplementary material for: An Earlier Spring Phenology Reduces Vegetation Growth Rate during the Green-Up Period in Temperate Forests
Source: MDPI journal article supplement (doi:10.3390/f14101984), 2023-10-01
Supplement: s1 [file s1 › forests-2613957-supplementary.pdf]

## Supplementary Information

**Table S1**

Aridity index for each site, and the regression slope of site-level correlations of the start of the growing season (SOS) with the growth rate (GR), sum of shortwave radiation (SR), mean air temperature (Ta) and mean soil water content (SWC) during the green-up period. The value with a significant correlation ( $P < 0.05$ ) between two variables with significant values is in bold.

| No. | Site name        | IGBP | Aridity index | Slope (GR ~ SOS) | Slope (SR ~ SOS) | Slope (Ta ~ SOS) | Slope (SWC ~ SOS) |
|-----|------------------|------|---------------|------------------|------------------|------------------|-------------------|
| 1   | Acadia           | DBF  | 1.37          | 0.28             | -0.30            | <b>0.77</b>      | -0.25             |
| 2   | Alligatorriver   | DBF  | 0.96          | 0.31             | -0.28            | 0.37             | 0.31              |
| 3   | Arbutuslake      | DBF  | 1.21          | 0.60             | -0.63            | 0.20             | 0.42              |
| 4   | Bartlett         | DBF  | 1.28          | -0.12            | 0.11             | 0.58             | 0.13              |
| 5   | Bartlettir       | DBF  | 1.28          | 0.53             | -0.29            | <b>0.80</b>      | -0.32             |
| 6   | Bostoncommon     | DBF  | 0.89          | 0.63             | -0.40            | 0.47             | -0.26             |
| 7   | Dollysods        | DBF  | 1.19          | 0.23             | -0.33            | -0.43            | -0.07             |
| 8   | Harvard          | DBF  | 1.10          | 0.12             | 0.06             | <b>0.65</b>      | 0.10              |
| 9   | Harvardbarn      | DBF  | 1.11          | 0.20             | 0.29             | 0.50             | -0.27             |
| 10  | Harvardhemlock   | DBF  | 1.11          | -0.05            | 0.02             | 0.03             | 0.09              |
| 11  | Joycekilmer      | DBF  | 1.49          | -0.03            | 0.53             | 0.55             | -0.52             |
| 12  | Mammothcave      | DBF  | 0.98          | 0.17             | -0.09            | 0.17             | 0.21              |
| 13  | Missouriozarks   | DBF  | 0.74          | 0.04             | 0.33             | 0.68             | -0.68             |
| 14  | Morganmonroe     | DBF  | 0.93          | 0.53             | <b>-0.69</b>     | 0.42             | 0.25              |
| 15  | Nationalcapital  | DBF  | 0.74          | <b>0.76</b>      | -0.49            | 0.34             | 0.53              |
| 16  | Northattleboroma | DBF  | 1.04          | 0.01             | 0.21             | 0.57             | -0.41             |
| 17  | Oakridge2        | DBF  | 0.98          | -0.04            | 0.30             | <b>-0.75</b>     | -0.41             |
| 18  | Proctor          | DBF  | 1.31          | 0.35             | -0.10            | <b>0.71</b>      | -0.08             |
| 19  | Readingma        | DBF  | 0.95          | 0.54             | -0.65            | 0.19             | -0.23             |
| 20  | Shiningrock      | DBF  | 1.51          | 0.20             | -0.17            | 0.36             | 0.10              |
| 21  | Smokylook        | DBF  | 1.13          | 0.35             | -0.22            | 0.32             | -0.32             |
| 22  | Smokypurchase    | DBF  | 1.50          | <b>0.78</b>      | -0.63            | 0.12             | -0.21             |
| 23  | Snakerivermn     | DBF  | 0.77          | 0.58             | -0.72            | -0.24            | 0.45              |
| 24  | Thompsonfarm2    | DBF  | 0.96          | 0.51             | -0.56            | 0.54             | 0.02              |
| 25  | Turkeypointdbf   | DBF  | 0.99          | <b>0.92</b>      | -0.71            | -0.06            | 0.22              |
| 26  | Willowcreek      | DBF  | 0.92          | 0.33             | -0.46            | 0.19             | 0.50              |
| 27  | Canadaobs        | ENF  | 0.57          | <b>0.97</b>      | <b>-0.94</b>     | 0.03             | 0.52              |
| 28  | Harvardbarn      | ENF  | 1.11          | 0.06             | 0.05             | 0.69             | 0.01              |
| 29  | Howland1         | ENF  | 1.12          | -0.09            | -0.11            | 0.61             | -0.07             |
| 30  | Missouriozarks   | ENF  | 0.74          | -0.37            | 0.22             | <b>0.80</b>      | -0.74             |
| 31  | Oregonmp         | ENF  | 0.70          | <b>0.77</b>      | -0.70            | 0.68             | -0.30             |
| 32  | Thompsonfarm2N   | ENF  | 0.96          | 0.46             | -0.57            | 0.06             | 0.64              |

|    |                  |     |      |             |       |             |      |
|----|------------------|-----|------|-------------|-------|-------------|------|
| 33 | Turkeypointenf39 | ENF | 1.00 | <b>0.76</b> | −0.46 | <b>0.75</b> | 0.10 |
|----|------------------|-----|------|-------------|-------|-------------|------|

---

**Figure S1**

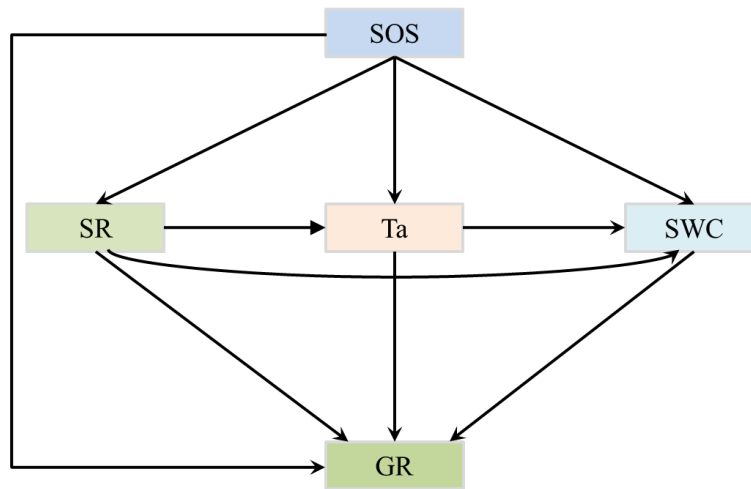

**Figure S1.** The initial structural equation model. All plausible pathways based on theoretical and empirical predictions were considered. SOS: start of growing season, SR: sum of shortwave radiation during the green-up period, Ta: mean air temperature during the green-up period, SWC: mean soil water content during the green-up period, GR: growth rate during the green-up period.

**Figure S2**

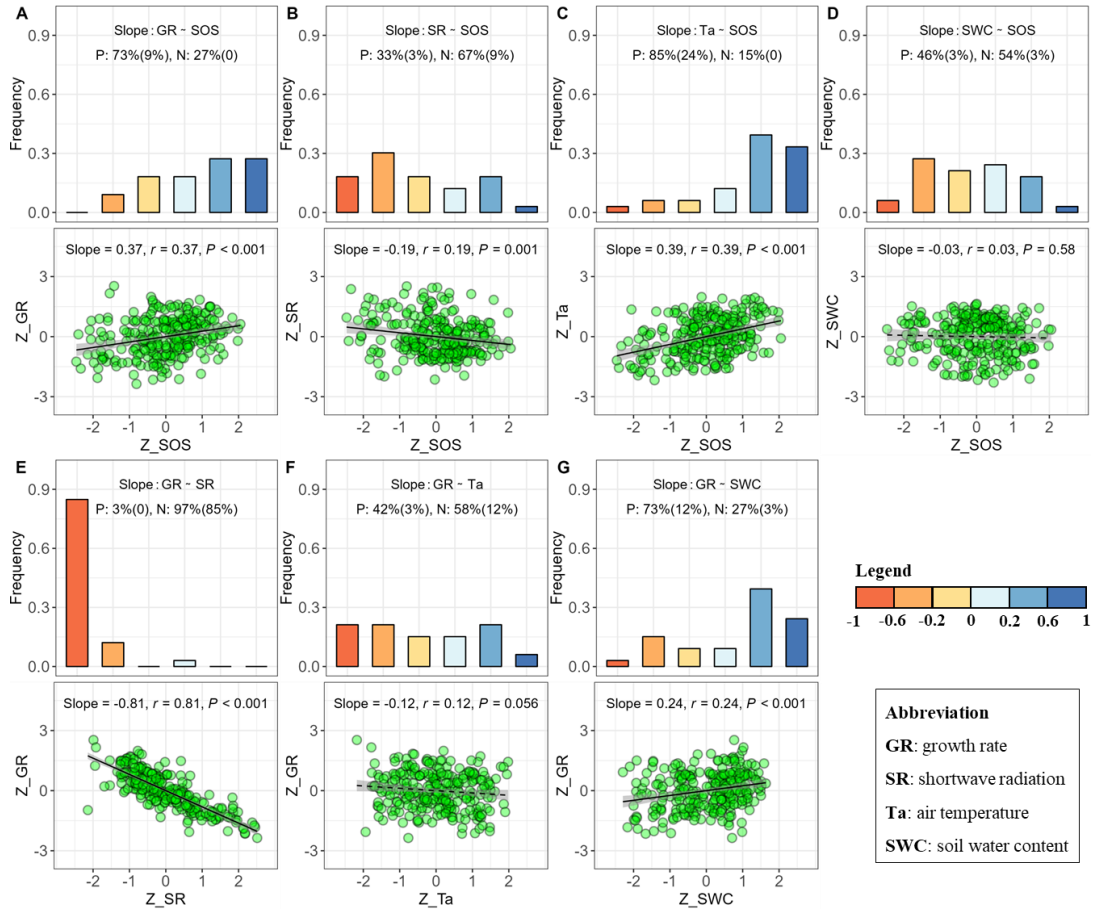

**Figure S2.** Frequency distributions and overall regression of site-level correlations of the start of the growing season (SOS) with the growth rate (GR, A), sum of shortwave radiation (SR, B), mean air temperature (Ta, C) and mean soil water content (SWC, D) during the green-up period, and the GR with SR (E), Ta (F) and SM (G). The percentages of areas of positive correlation (P) and negative correlation (N) are shown, and the significant percentages are displayed in parentheses. The results are derived from 268 year-site PhenoCam observations. The time-series data for each variable from each site were standardized using Z-scores. The extraction of SOS was based on the threshold method of 30%.

**Figure S3**

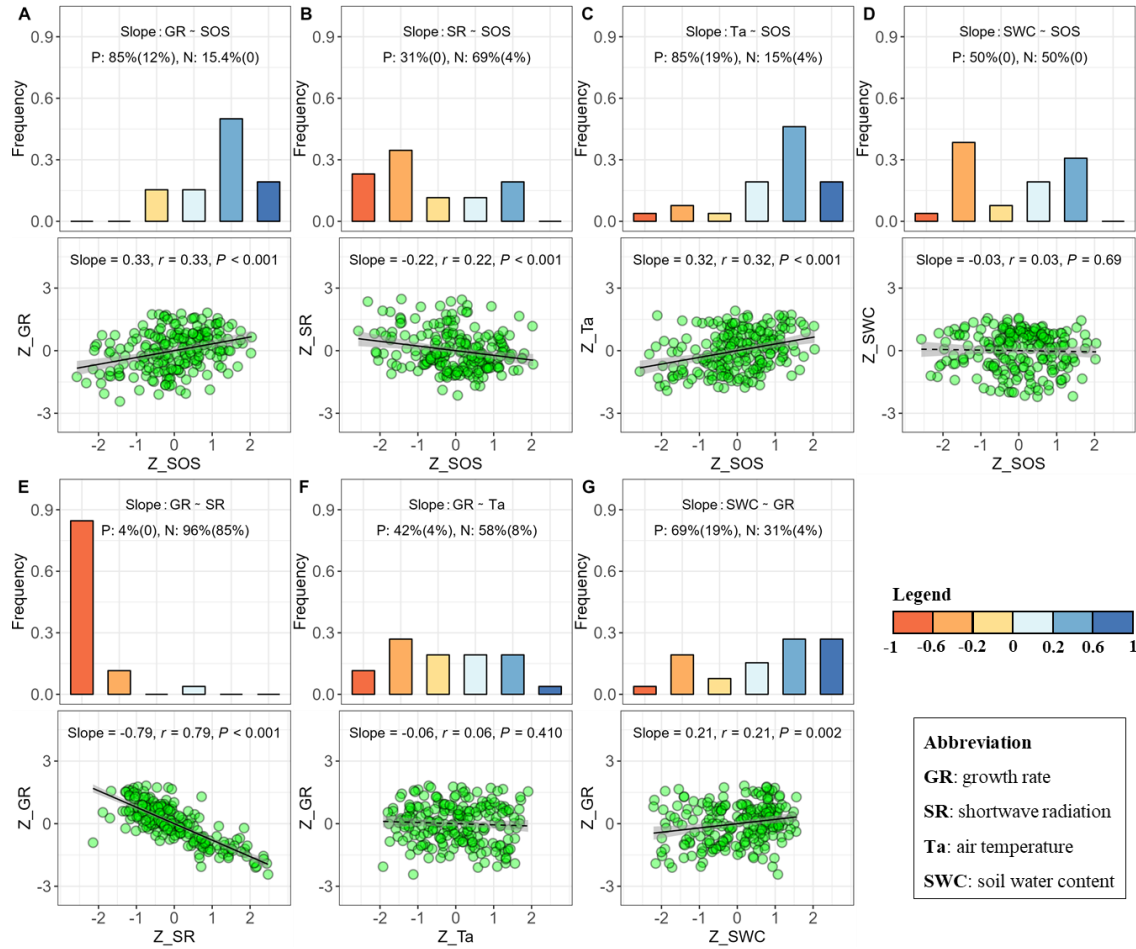

**Figure S3.** Frequency distributions and overall regression of site-level correlations of the start of the growing season (SOS) with the growth rate (GR, A), sum of shortwave radiation (SR, B), mean air temperature (Ta, C) and mean soil water content (SWC, D) during the green-up period, and the GR with SR (E), Ta (F) and SM (G) for deciduous broadleaf forests (DBF). The percentages of areas of positive correlation (P) and negative correlation (N) are shown, and the significant percentages are displayed in parentheses. The results are derived from 268 year-site PhenoCam observations. The time-series data for each variable from each site were standardized using Z-scores. The extraction of SOS was based on the threshold method of 20%.

**Figure S4**

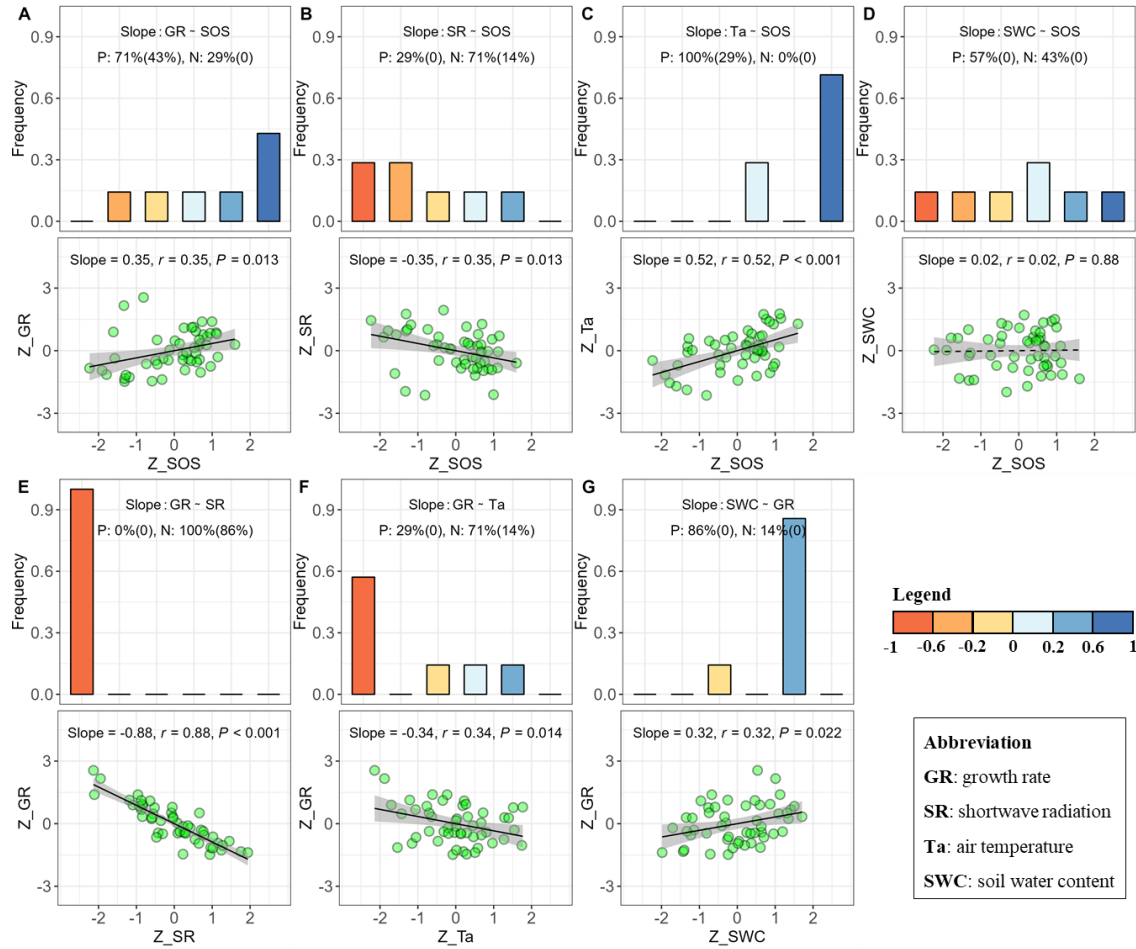

**Figure S4.** Frequency distributions and overall regression of site-level correlations of the start of the growing season (SOS) with the growth rate (GR, A), sum of shortwave radiation (SR, B), mean air temperature (Ta, C) and mean soil water content (SWC, D) during the green-up period, and the GR with SR (E), Ta (F) and SM (G) for evergreen needleleaf forests (ENF). The percentages of areas of positive correlation (P) and negative correlation (N) are shown, and the significant percentages are displayed in parentheses. The results are derived from 268 year-site PhenoCam observations. The time-series data for each variable from each site were standardized using Z-scores. The extraction of SOS was based on the threshold method of 20%.

**Figure S5**

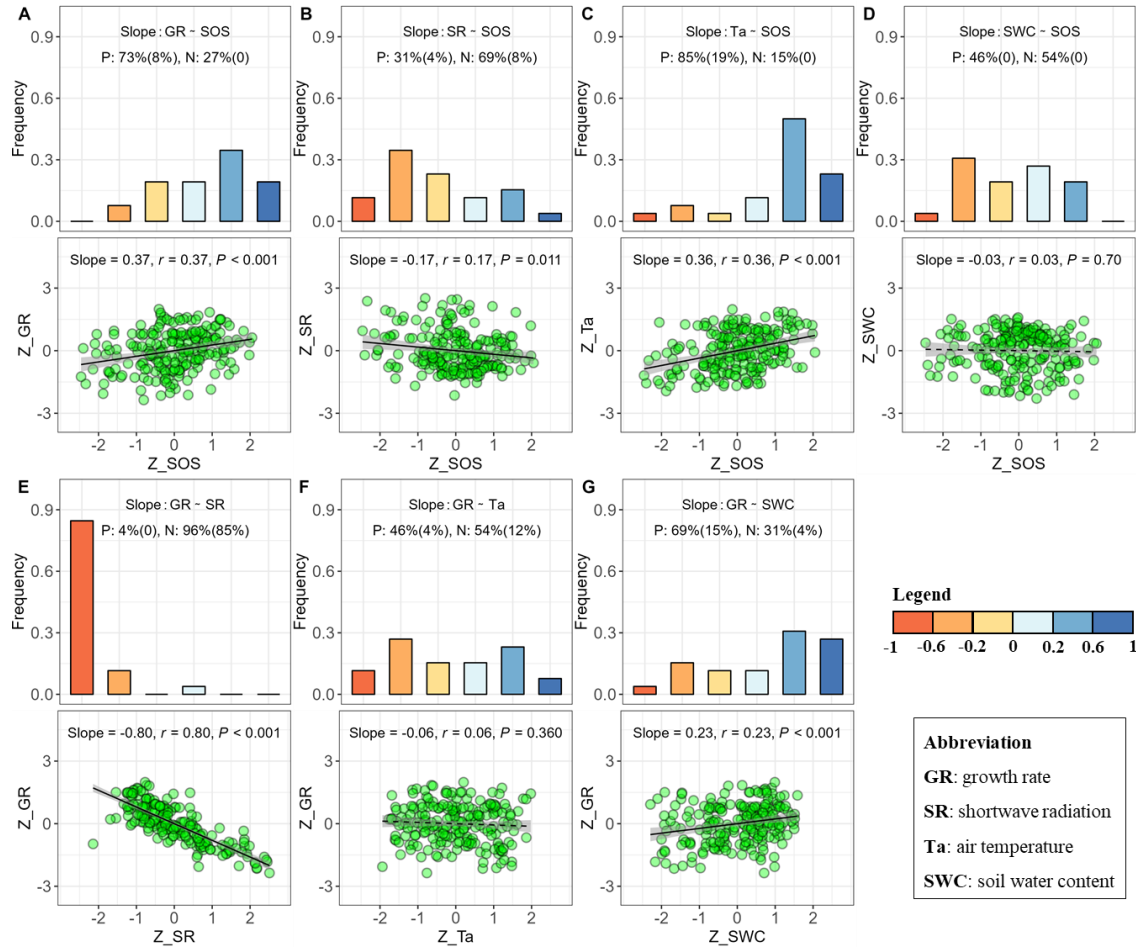

**Figure S5.** Frequency distributions and overall regression of site-level correlations of the start of the growing season (SOS) with the growth rate (GR, A), sum of shortwave radiation (SR, B), mean air temperature (Ta, C) and mean soil water content (SWC, D) during the green-up period, and the GR with SR (E), Ta (F) and SM (G) for deciduous broadleaf forests (DBF). The percentages of areas of positive correlation (P) and negative correlation (N) are shown, and the significant percentages are displayed in parentheses. The results are derived from 268 year-site PhenoCam observations. The time-series data for each variable from each site were standardized using Z-scores. The extraction of SOS was based on the threshold method of 30%.

**Figure S6**

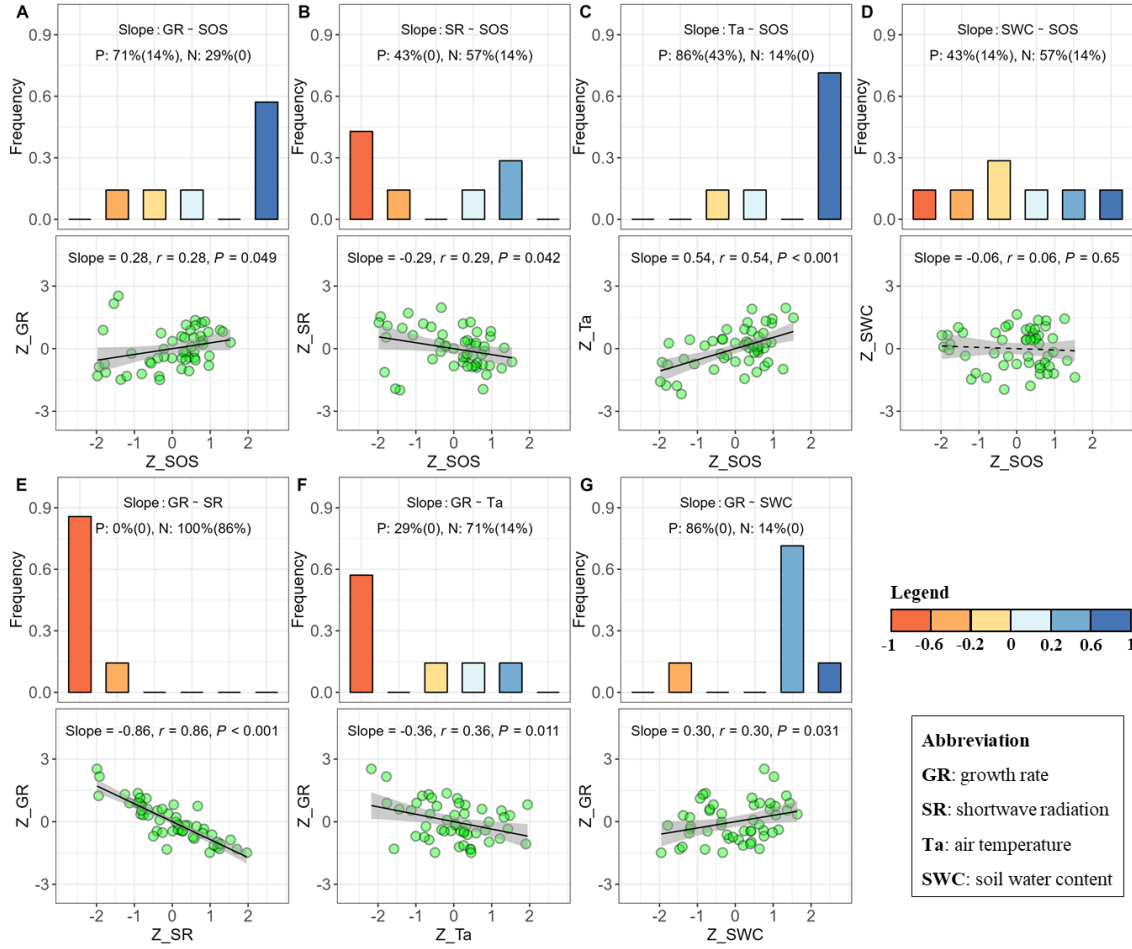

**Figure S6.** Frequency distributions and overall regression of site-level correlations of the start of the growing season (SOS) with the growth rate (GR, A), sum of shortwave radiation (SR, B), mean air temperature (Ta, C) and mean soil water content (SWC, D) during the green-up period, and the GR with SR (E), Ta (F) and SM (G) for evergreen needleleaf forests (ENF). The percentages of areas of positive correlation (P) and negative correlation (N) are shown, and the significant percentages are displayed in parentheses. The results are derived from 268 year-site PhenoCam observations. The time-series data for each variable from each site were standardized using Z-scores. The extraction of SOS was based on the threshold method of 30%.

**Figure S7**

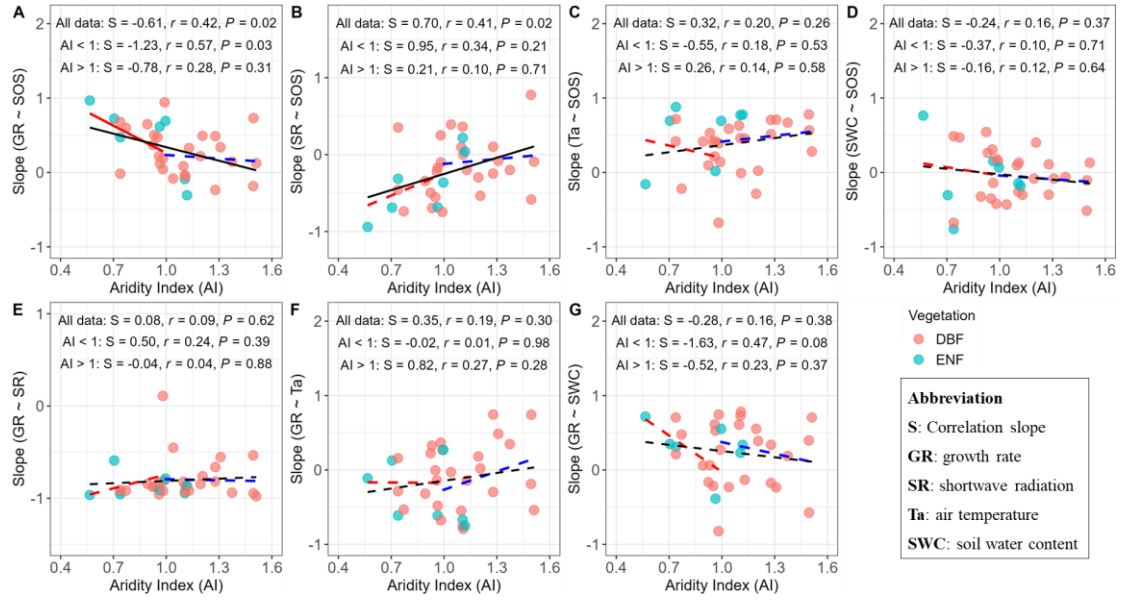

**Figure S7.** Changes in site-level slopes of the growth rate (GR, A), sum of shortwave radiation (SR, B), mean air temperature (Ta, C), mean soil water content (SWC, D) during the green-up period, and the start of the growing season (SOS) with the aridity index, and site-level slopes of the SR (E), Ta (F), SM (G), and the GR with the aridity index. The results are derived from 268 year-site PhenoCam observations. The time-series data for each variable from each site were standardized using Z-scores. Lower aridity-index values correspond to drier climatic conditions. DBF, deciduous broadleaf forest; ENF, evergreen needleleaf forest. The extraction of SOS was based on the threshold method of 30%.

**Figure S8**

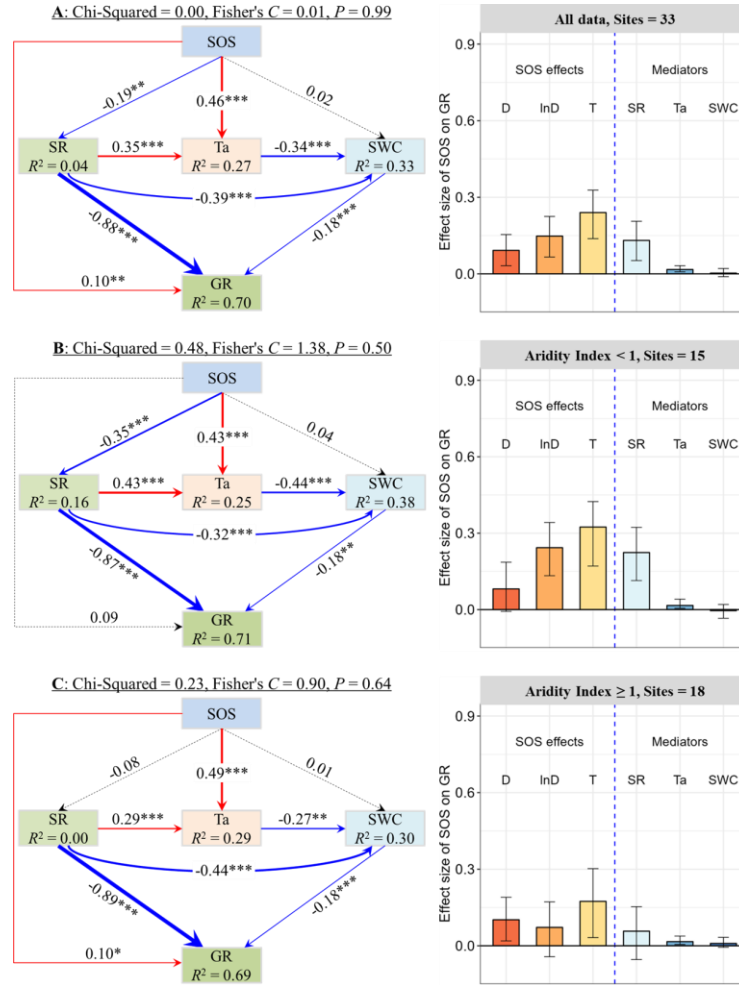

**Figure S8.** Structural equation models (SEMs) and the effect sizes of the start of the growing season (SOS) on vegetation growth rate (GR) through direct effects (SOS effects) and indirect effects via ‘mediator’ variables (mediators) for all data (A), the data with aridity index < 1 (B), and the data with aridity index ≥ 1 (C). D: direct effect; InD: indirect effect; T: total effect; SR: sum of shortwave radiation during the green-up period; Ta: mean air temperature during the green-up period; SWC: mean water content during the green-up period. The fitting parameters of SEMs are shown at the top of each SEM. The error bars in the histograms represent 95% confidence intervals. The solid line refers to a significant correlation between variables with  $P < 0.05$  (\*),  $P < 0.01$  (\*\*) and  $P < 0.001$  (\*\*\*). The red and blue lines indicate positive and negative relationships, respectively. The dotted or black line indicates a non-significant correlation between variables. The thickness of the lines indicates the strength of the correlation. The time-series data for each variable from each pixel of the SIF data were standardized using Z-scores. Lower aridity index values correspond to more arid climate conditions and vice versa. The extraction of SOS was based on the threshold method of 30%.

**Figure S9**

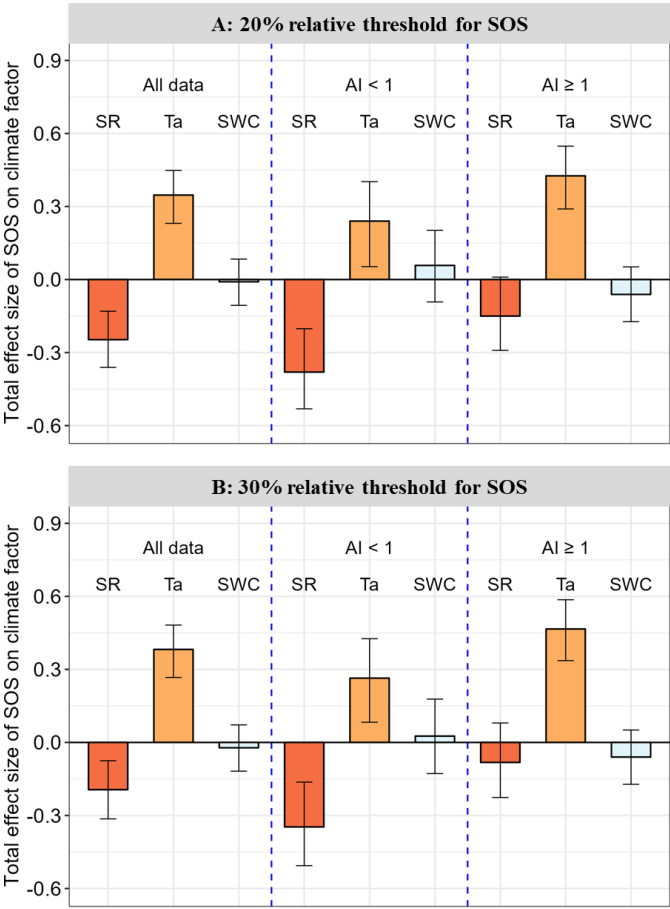

**Figure S9.** Total effect size of SOS on accumulative shortwave radiation (SR), mean air temperature (Ta), mean soil water content (SWC) during the green-up period for all data, the data with aridity index < 1, and the data with aridity index ≥ 1 based on the threshold method of 20% (A) and 30% (B). These results are derived from the structural equation models in Figures. 4 and S8. The error bars in the histograms represent 95% confidence intervals. Lower aridity-index values correspond to drier climatic conditions.
